# Supplementary material
Source: PubMed Central journal article supplement (PMC9543312)

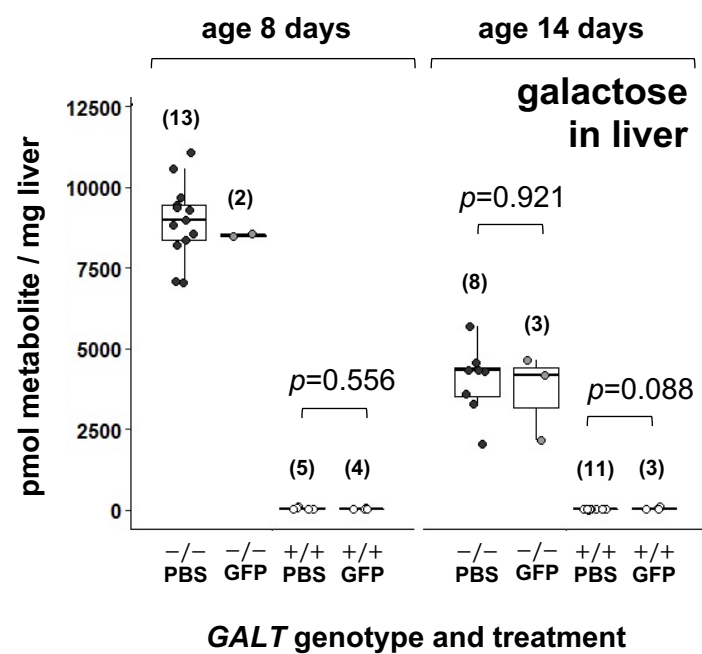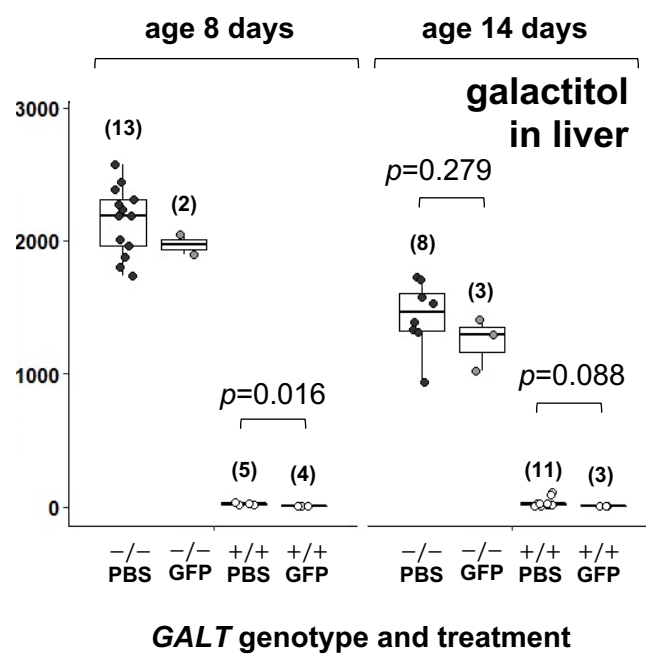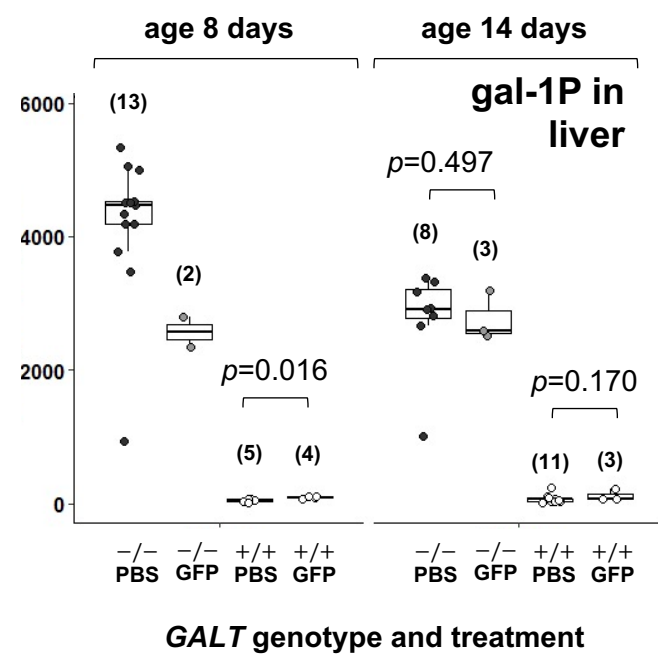

Supplement: JIMD-45-203-s003.pdf [file JIMD-45-203-s003.pdf]

Frontal cortex

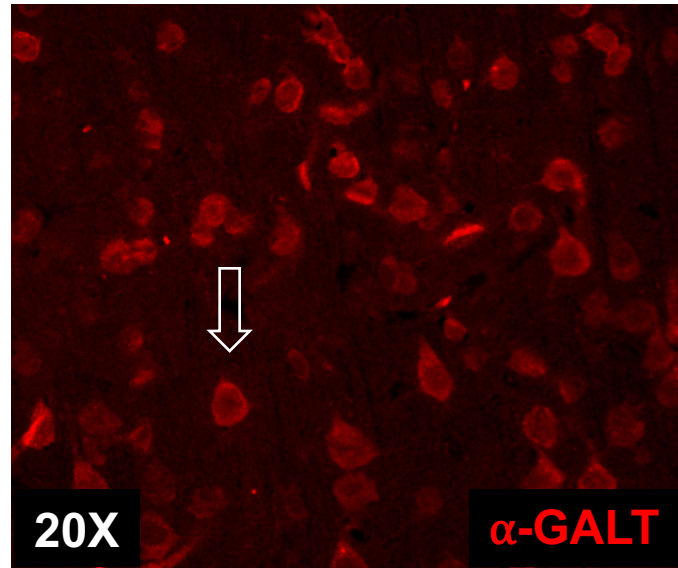

Cerebellum

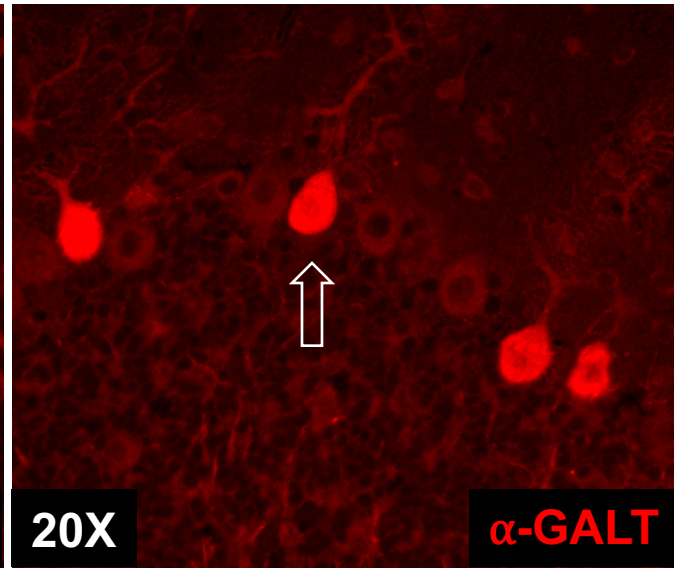

Hippocampus

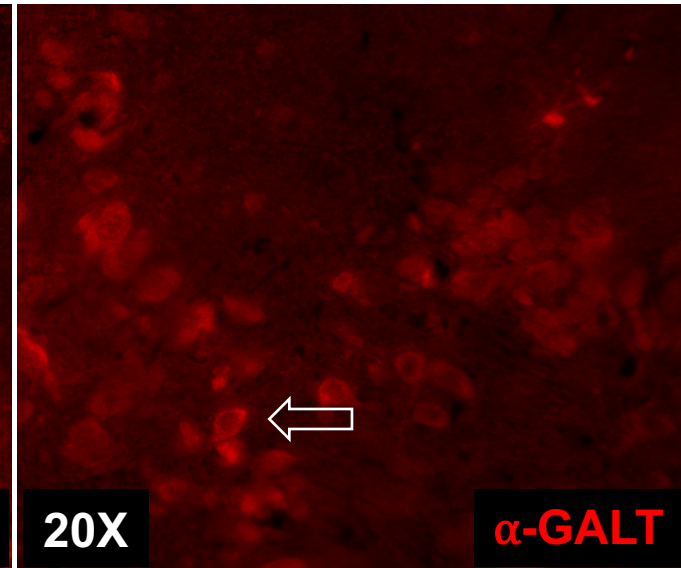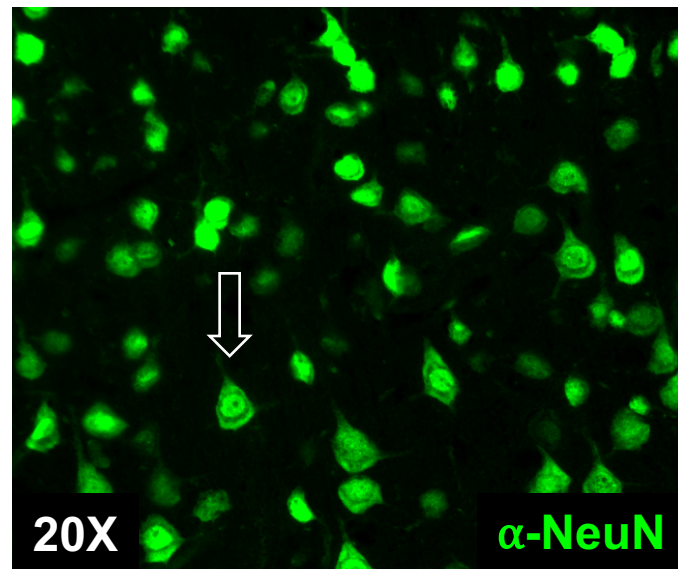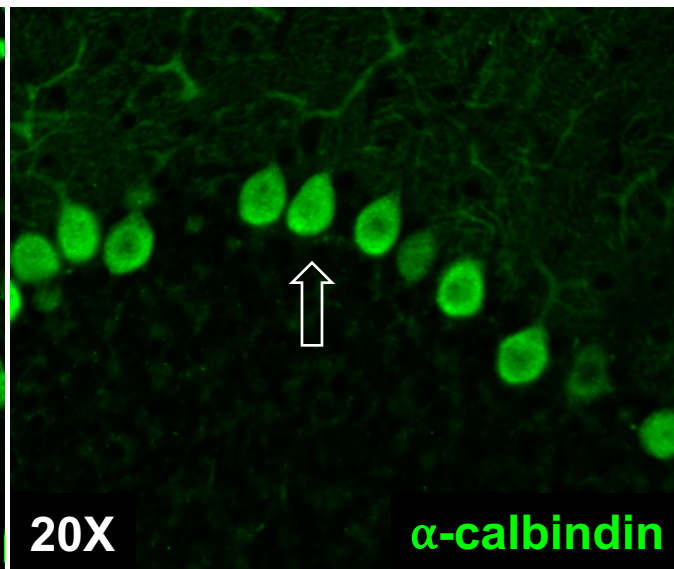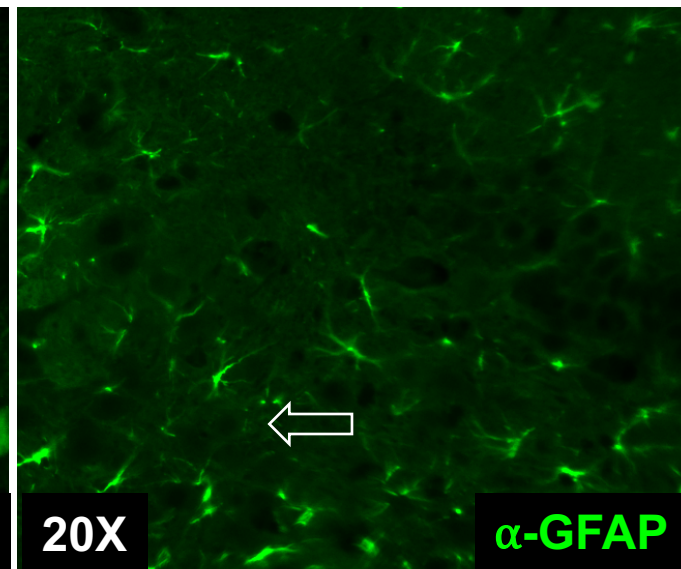

Supplement: JIMD-45-203-s004.pdf [file JIMD-45-203-s004.pdf]

galactose

galactitol

gal-1P

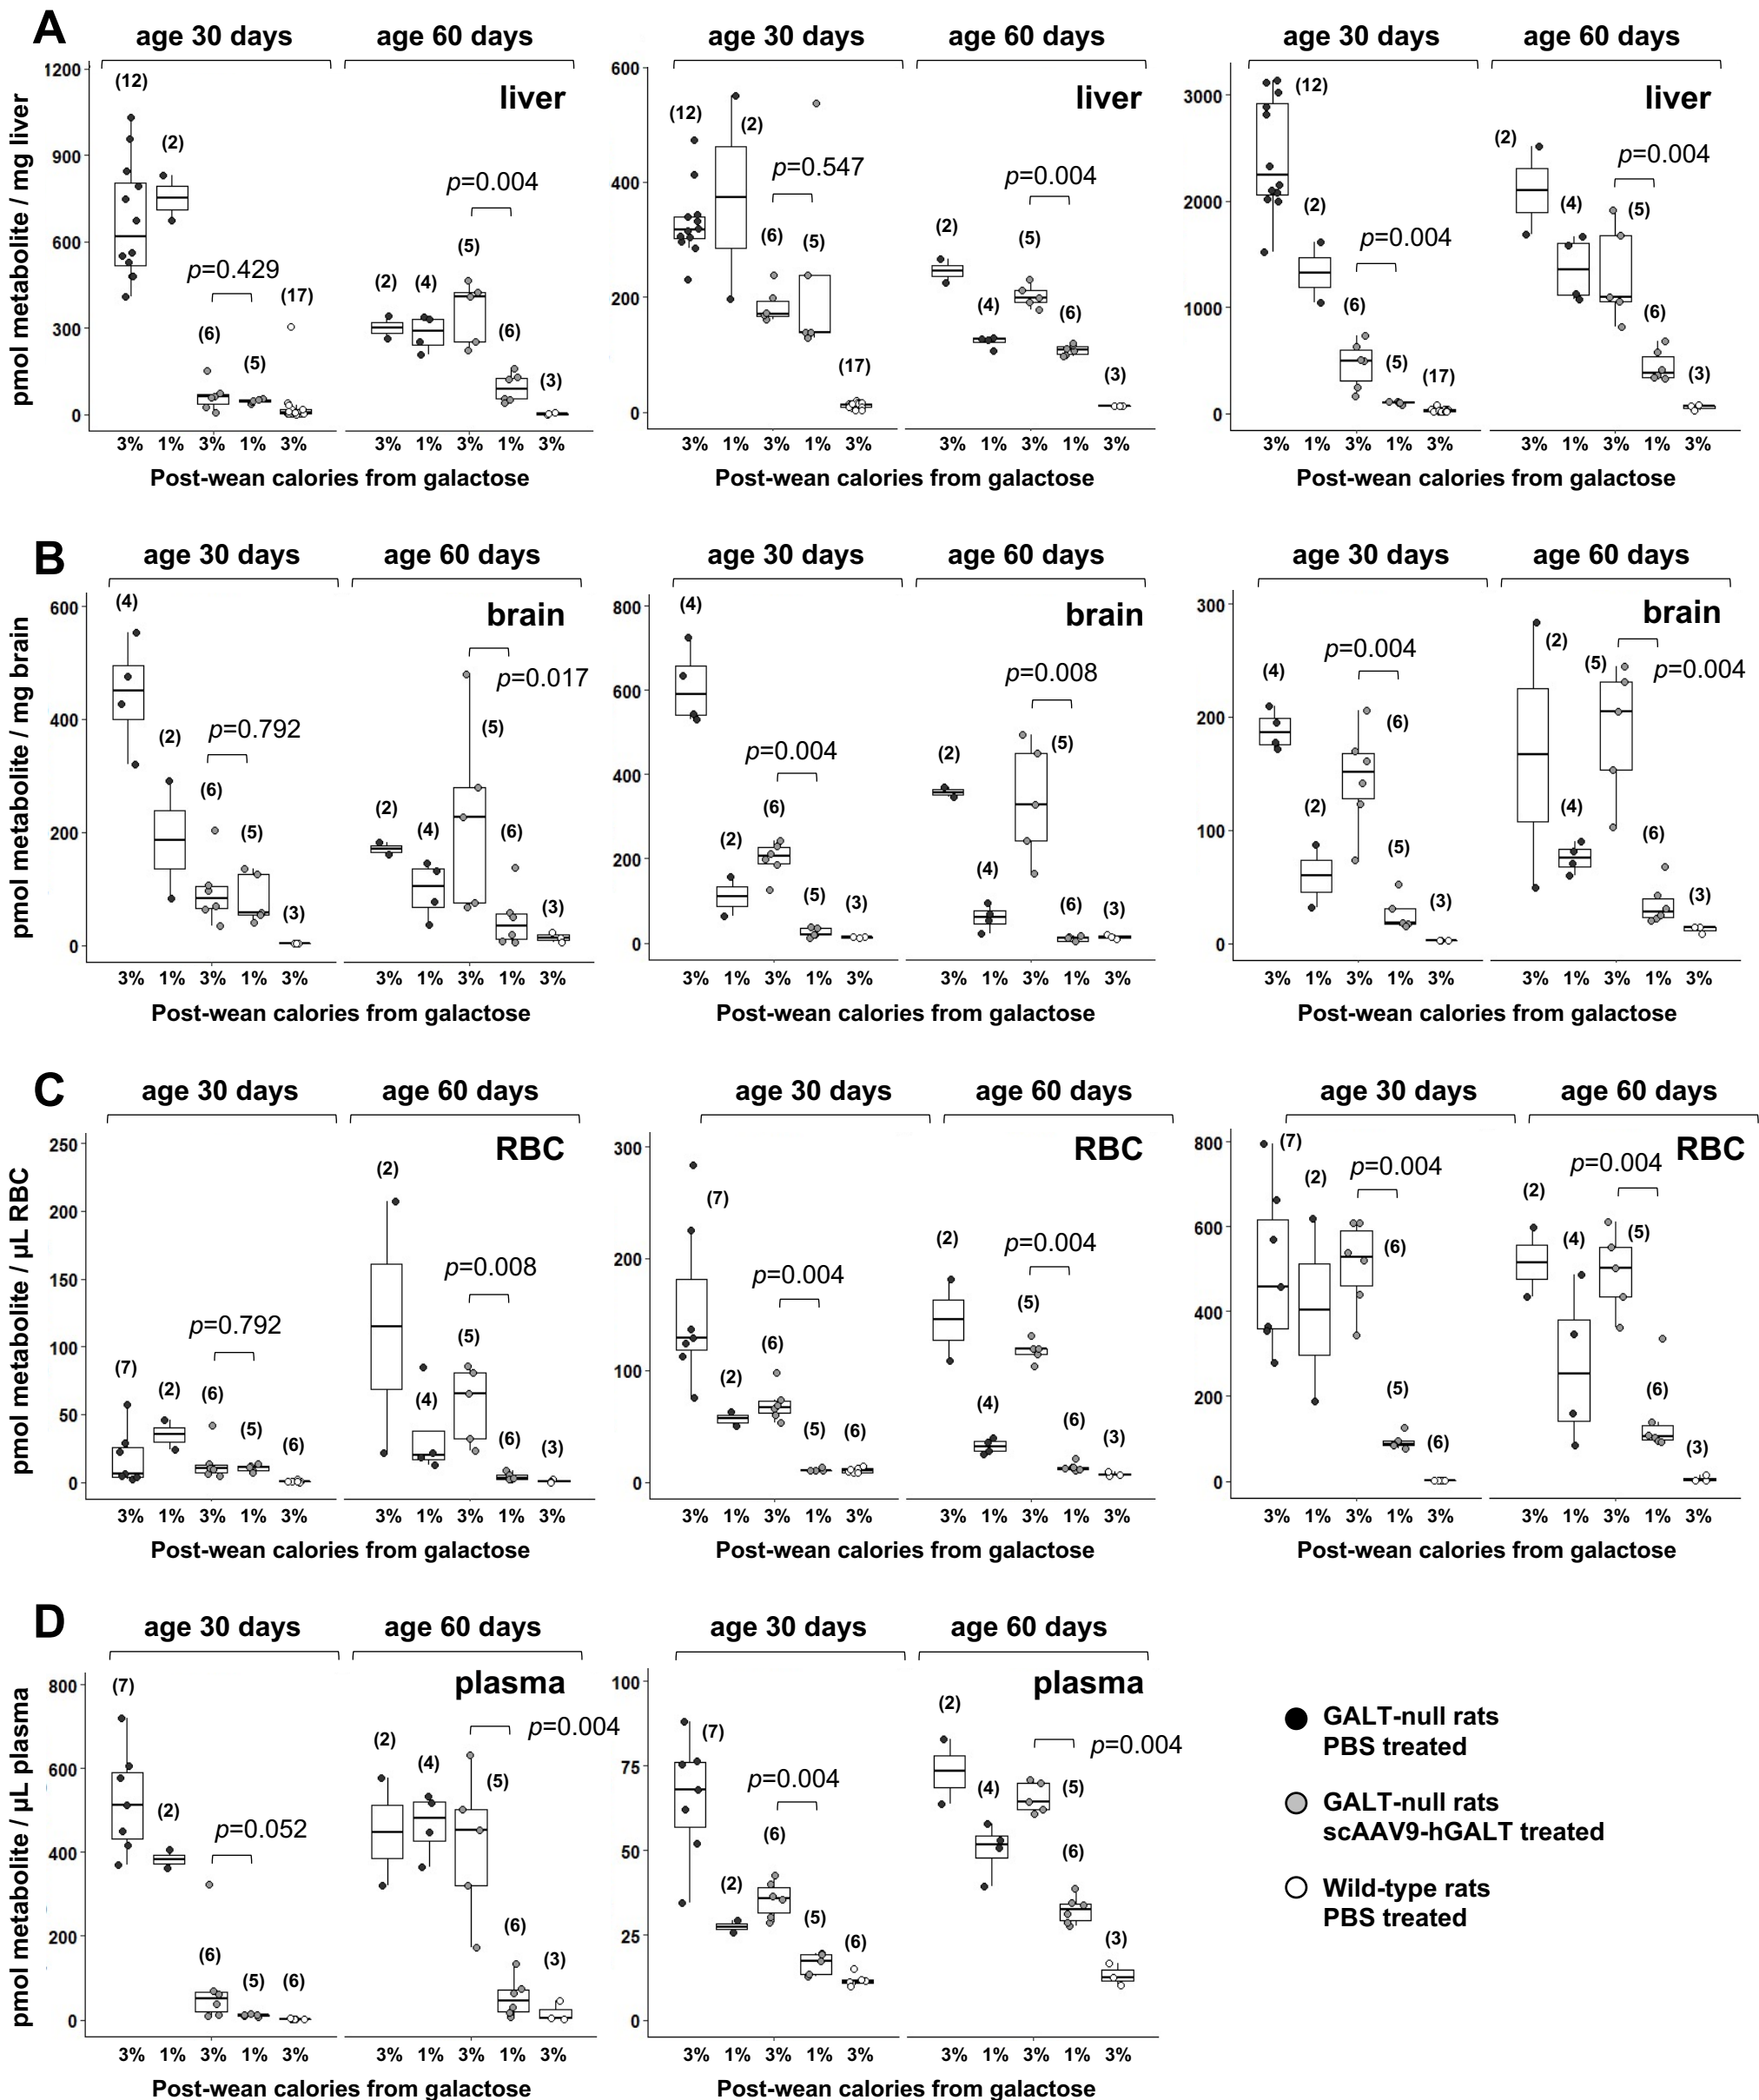

Supplement: JIMD-45-203-s005.pdf [file JIMD-45-203-s005.pdf]
